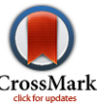

## Correction

# Correction: Heat-Related Mortality in India: Excess All-Cause Mortality Associated with the 2010 Ahmedabad Heat Wave

## The PLOS ONE Staff

Natural Resources Defense Council was omitted as a funder for this study. Please refer to the correct funding statement below:

Dr. Hess's work on this project was via a consultancy arrangement with the Natural Resources Defense Council (NRDC) funded by the Climate and Knowledge Development Network (CDKN). This work was funded by a grant from the Climate Knowledge Development Network. The funders had no role in study design, data collection and analysis, decision to publish, or preparation of the manuscript.

## Reference

1. Azhar GS, Mavalankar D, Nori-Sarma A, Rajiva A, Dutta P, et al. (2014) Heat-Related Mortality in India: Excess All-Cause Mortality Associated with the 2010 Ahmedabad Heat Wave. PLoS ONE 9(3): e91831. doi:10.1371/journal.pone.0091831

---

**Citation:** The PLOS ONE Staff (2014) Correction: Heat-Related Mortality in India: Excess All-Cause Mortality Associated with the 2010 Ahmedabad Heat Wave. PLoS ONE 9(9): e109457. doi:10.1371/journal.pone.0109457

**Published:** September 25, 2014

**Copyright:** © 2014 The PLOS ONE Staff. This is an open-access article distributed under the terms of the Creative Commons Attribution License, which permits unrestricted use, distribution, and reproduction in any medium, provided the original author and source are credited.
